# Supplementary material
Source: publisher site journal article supplement (https://www.dovepress.com/article/489090)
Supplement: Supplementary file 1 [file get_supplementary_file.php]

**Table S1: Initial treatment, additional treatments, and outcome**

| Patient No. | Initial VA at KKESH | VA at last follow up | Initial Treatment | Additional Treatments | Outcome |
| --- | --- | --- | --- | --- | --- |
| 1 | LP | 5/400 | PPV and intravitreal antimicrobial injections (Vancomycin, Ceftazidime, and Amphotericin B) | None | Anatomical success |
| 2 | HM | NLP | PPV, intravitreal antibiotic (Vancomycin and Ceftazidime) and steroid (Dexamethasone) injection | (1) vitreous tap and intravitreal antimicrobial injection  (2) anterior chamber washout and intracameral antimicrobial injection.  (3) evisceration | Anatomical failure |
| 3 | LP | HM | PPV, IOL removal, and intravitreal antimicrobial injection (Vancomycin, Ceftazidime and Voriconazole) | None | Anatomical success |
| 4 | HM | 20/200 | AC washout, PPV, and intravitreal antimicrobial injection (Vancomycin, Ceftazidime, Voriconazole, and Amphotericin B) | None | Functional and anatomical success |
| 5 | 20/60 | 20/300 | PPV, IOL removal, and intravitreal antimicrobial injection (Vancomycin, Ceftazidime, Voriconazole, and Amphotericin B) | None | Functional and anatomical success |
| 6 | 20/200 | 20/80 | AC washout, PPV, intravitreal and intracameral antimicrobial injection (Vancomycin, Ceftazidime, Voriconazole, and Amphotericin B) | None | Functional and anatomical success |
| 7 | HM | NLP | Vitreous tap and intravitreal antimicrobial injection (Vancomycin, Ceftazidime, and Voriconazole) | (1) anterior chamber washout and intracameral antimicrobial injection with IOL explantation  (2) anterior chamber washout, iridectomy, pars plana vitrectomy, and intravitreal antimicrobial injection  (3) intracameral antifungal injection  (4) intracameral antifungal injection  (5) anterior chamber washout and intracameral antifungal injection  (6) anterior chamber washout and intravitreal antifungal injection | Anatomical failure (evisceration) |
| 8 | 5/200 | 20/300 | Observation and topical fortified antibiotics | None | Functional and anatomical success |
| 9 | HM | 20/300 | AC washout, IOL removal, and intracameral antimicrobial injection (Vancomycin and Ceftazidime) | 1) anterior chamber washout and intracameral antibiotics injection  (2) vitreous tap and intravitreal antifungal injection  (3) pars plana vitrectomy with intravitreal antimicrobial injection  (4) anterior chamber washout and intracameral antifungal injection | Functional and anatomical success |
| 10 | HM | 20/400 | Vitreous tap and intravitreal antimicrobial injection (Vancomycin, Ceftazidime, and Amphotericin B) | (1) anterior chamber washout, pars plana vitrectomy, and intravitreal antimicrobial injection | Functional and anatomical success |
| 11 | 20/400 | 20/400 | Vitreous tap and intravitreal antimicrobial injection (Vancomycin, Ceftazidime, Voriconazole, and Amphotericin B) | None | Functional and anatomical success |
| 12 | HM | 20/30 | Vitreous tap and intravitreal antimicrobial injection (Vancomycin, Ceftazidime, Voriconazole, and Amphotericin B) | (1) anterior chamber washout, pars plana vitrectomy, and intravitreal antifungal injection | Functional and anatomical success |
| 13 | HM | NR | Vitreous tap and intravitreal antimicrobial injection (Vancomycin, Ceftazidime, and Voriconazole) | None | Lost to follow up |
| 14 | 20/50 | 20/50 | Vitreous tap and intravitreal antimicrobial injection (Vancomycin, Ceftazidime, and Voriconazole) | (1) pars plana vitrectomy with intravitreal antifungal injection | Functional and anatomical success |
| 15 | HM | NR | Vitreous tap and intravitreal antimicrobial injection (Vancomycin, Ceftazidime, and Voriconazole) | None | Signed DAMA. |
| 16 | CF | HM | Vitreous tap and intravitreal antimicrobial injection (Vancomycin, Ceftazidime, and Voriconazole) | (1) anterior chamber washout, pars plana vitrectomy, and intravitreal antimicrobial injection  (2) IOL explantation, pars plana vitrectomy, and intravitreal antifungal injection  (3) vitreous tap and intravitreal antimicrobial injection; | Anatomical failure |
| 17 | LP | 5/200 | Vitreous tap and intravitreal antimicrobial injection (Vancomycin, Ceftazidime, Voriconazole, and Amphotericin B) | (1) anterior chamber washout, IOL explantation, pars plana vitrectomy, intravitreal antimicrobial injection, intracameral antimicrobial injection and subconjunctival antimicrobial injection | Anatomical success |
| 18 | HM | 5/200 | Observation and topical fortified antimicrobial | (1) anterior chamber washout, IOL explantation, lens capsule removal, pars plana vitrectomy, and intravitreal antibiotic injection | Anatomical success |
| 19 | HM | 20/30 | Vitreous tap and intravitreal antimicrobial injection (Vancomycin, Ceftazidime, and Voriconazole) | (1) anterior chamber washout, pars plana vitrectomy, intravitreal antimicrobial injection, and intracameral antifungal injection | Functional and anatomical success |
| 20 | LP | LP | Observation and topical fortified antibiotics | (1) anterior chamber washout, pars plana vitrectomy, and intravitreal antimicrobial injection  (2) vitreous tap and intravitreal antimicrobial injection  (3) vitreous tap and intravitreal antifungal injection | Anatomical failure (phthisis bulbi with detached retina) |
| 21 | 5/200 | 20/300 | Observation and topical fortified antibiotics | (1) IOL explantation, pars plana vitrectomy, and intravitreal antimicrobial injection | Functional and anatomical success |
| 22 | LP | HM | Vitreous tap and intravitreal antimicrobial injection (Vancomycin, Ceftazidime, and Voriconazole) | None | Anatomical success |
| 23 | LP | HM | Vitreous tap and intravitreal antimicrobial injection (Vancomycin, Ceftazidime, and Voriconazole) | (1) anterior chamber washout, IOL explantation, iridectomy, pars plana vitrectomy, and intravitreal antimicrobial injection  (2) anterior chamber washout, intracameral antimicrobial injection, and iris intrastromal antifungal injection | Anatomical success |
| 24 | 20/60 | NLP | Vitreous tap and intravitreal antimicrobial injection (Vancomycin, Ceftazidime, and Amphotericin B) | (1) TPKP, AMT, intracameral antimicrobial injection  (2) evisceration | Anatomical failure (evisceration) |
| 25 | HM | 5/200 | Vitreous tap and intravitreal antimicrobial injection (Vancomycin, Ceftazidime, and Voriconazole) | (1) anterior chamber washout, pars plana vitrectomy, intravitreal antimicrobial injection, intracameral antimicrobial injection, and intracameral Avastin injection | Anatomical success |
| 26 | HM | NLP | Observation and topical antibiotics | (1) vitreous tap and intravitreal antimicrobial injection | Anatomical failure |
| 27 | HM | 20/70 | Vitreous tap and intravitreal antibiotic injection (Vancomycin and Ceftazidime) | (1) vitreous tap and intravitreal antibiotic injection  (2) pars plana vitrectomy and intravitreal antimicrobial injection | Functional and anatomical success |
| 28 | HM | LP | Observation and topical fortified antibiotics | None | Anatomical success |
| 29 | 5/200 | 20/300 | Vitreous tap and intravitreal antimicrobial injection (Vancomycin, Ceftazidime, and Voriconazole) | (1) anterior chamber washout, pars plana vitrectomy, and intravitreal antimicrobial injection  (2) IOL explantation, pars plana vitrectomy, and intravitreal antimicrobial injection  (3) vitreous tap and intravitreal antifungal injection | Functional and anatomical success |

LP: Light Perception, HM: Hand Motion, CF: Counting Fingers, IOL: Intraocular lens, PPV: Pars Plana Vitrectomy, TPKP: Therapeutic Penetrating Keratoplasty, AMT: Amniotic Membrane Transplantation, DAMA: Discharge Against Medical Advice.
